# Supplementary material for: Three-dimensional heterogeneity in liquid electrolyte structures promotes Na ion transport and storage performance in Na-ion batteries
Source: PubMed Central journal article supplement — Chem Sci. 2023 May 16;14(22):5983–91. doi: 10.1039/d3sc01453c (PMC10246696; doi:10.1039/d3sc01453c), 2023-05-16
Supplement: SC-014-D3SC01453C-s001.pdf [file SC-014-D3SC01453C-s001.pdf]

## 1 **Experimental section**

### 2 **Electrolyte and electrode preparation**

3 The NaFSI (Solvionic, 99.7%) was dried at 80 °C for 12 h in an Ar-filled glovebox  
4 before use. TEP (Sigma-Aldrich, 99.8%), PhCF<sub>3</sub> (Macklin, 99%) and 1,4-Ph(CF<sub>3</sub>)<sub>2</sub>  
5 (Macklin, 99%) were dehydrated with 4 Å molecular sieves for two days before used.  
6 The electrolytes were prepared as below. Firstly, NaFSI was dissolved in TEP to form  
7 the HCE, with a NaFSI:TEP molar ratio of 1:1.5. Then, the DHCEs were prepared by  
8 adding PhCF<sub>3</sub> or 1,4-Ph(CF<sub>3</sub>)<sub>2</sub> diluents into the HCE with a molar ratio of 1:1.5:2  
9 (NaFSI : TEP : diluent). All the electrolytes were prepared and stored in a glovebox  
10 under high-purity Ar gas at room temperature. To prepare electrodes, the HC (or CNFM,  
11 Na<sub>3</sub>V<sub>2</sub>(PO<sub>4</sub>)<sub>3</sub> (NVP))/super P/polyvinylidene fluoride (PVDF) with a weight ratio of  
12 90:5:5 was blended in N-Methyl-2-pyrrolidone to form slurries. Then, the slurry was  
13 cast on Cu foil for the HC anode and Al foil for the CNFM cathode. The electrode was  
14 punched into the circular electrode with a diameter of 12 mm and dried at 120 °C under  
15 vacuum for 12 h. The mass loading for HC is around 1.3 mg cm<sup>-2</sup> for half cells and 6.7  
16 mg cm<sup>-2</sup> for full cells, the mass loading for NVP is around 3.5 mg cm<sup>-2</sup>, and the mass  
17 loading for CNFM is around 14.6 mg cm<sup>-1</sup>. The N/P ratio employed for the CNFM||HC  
18 full cell is 1.09.

19

### 20 **Cell fabrication and electrochemical measurements**

21 CR2032 coin cells were used for the CNFM||Na, HC||Na, and CNFM||HC cells,  
22 with the glass fibre (Whatman, F-type) as separator and the electrolyte was controlled  
23 as 150 μL per cell. All coin cells were assembled with designed electrodes and  
24 electrolytes in the glove box. Galvanostatic charge-discharge measurements for cells  
25 were performed on the Neware battery test system (MHW-200 shenzhen, china). The  
26 CNFM||Na half cells were cycled between 1.8 V and 4.0 V while the CNFM||HC full  
27 cells were cycled between 1.0 V and 4.0 V. The cycling performance of HC||Na cells  
28 was demonstrated with a fixed discharge capacity of 300 mAh g<sup>-1</sup> at 0.2 C (25 °C) or

1 0.33 C (60 °C), and the charge-discharge voltage profiles were recorded to evaluate the  
2 degradation of the Na<sup>+</sup> storage in HC electrodes at different temperatures. CV  
3 measurements were conducted for HC and CNFM electrodes using an electrochemical  
4 workstation (VSP300, BioLogic, France) at sweep rates of 0.2 mV s<sup>-1</sup> in the voltage  
5 range of 0-3 V (HC) and 1.5-4 V (CNFM) versus Na/Na<sup>+</sup>. Operando-EIS for CNFM||HC  
6 full cells were performed using VSP300 in a frequency range of 7×10<sup>6</sup>~5×10<sup>-3</sup> Hz at  
7 25 °C.

8

## 9 **Characterizations**

10 The ionic conductivity of electrolytes was measured using a Mettler Toledo  
11 conductivity meter (S230, Cond probe InLab 751) in the temperature range of 0 to 50 °C.  
12 The Na<sup>+</sup> transference number was evaluated utilizing Na || Na symmetric cell combined  
13 by EIS before and after the chronoamperometry (CA) test and calculated by the  
14 following equation (1)<sup>1</sup>:

$$15 \quad t_{Na^+} = \frac{I_{ss}(\Delta V - I_0 R_0)}{I_0(\Delta V - I_{ss} R_{ss})} \quad (1)$$

16 Where  $I_0$  and  $I_{ss}$  are the initial current and steady-state current, respectively,  $\Delta V$  is  
17 the applied voltage polarization (10 mV),  $R_0$  and  $R_{ss}$  are the electrode resistances before  
18 and after the polarization, respectively. The DSC tests were used to determine the phase  
19 evolution of the electrolytes in a temperature range of -70~20 °C with temperature  
20 change rate of 10 °C min<sup>-1</sup>. NMR (Avance-400) and Raman (Renishaw inVia)  
21 measurements were employed to investigate the local solvation structure of the as-  
22 prepared electrolytes. The microstructures of the HC and CNFM electrodes were  
23 obtained using HRTEM (JEM 2100F). XPS measurements were performed using  
24 Thermo Scientific K-Alpha. The C 1s peak (284.8 eV) was employed as the reference  
25 to calibrate the position of other peaks. The postmortem analysis of electrodes for the  
26 XPS and HRTEM were obtained from CNFM||HC full cells after the first cycle.

27

## 28 **Molecular dynamics simulation**

1 The classical MD simulations were performed by GROMACS 5.0 software.<sup>2</sup> The amber  
2 force field parameters needed for this study were obtained from Gaussian and acpype.<sup>3</sup>  
3 Three systems consisting of 100 NaFSI/150 TEP, 100 NaFSI/150 TEP/200 PhCF<sub>3</sub>, and  
4 100 NaFSI/150 TEP/200 1,4-Ph(CF<sub>3</sub>)<sub>2</sub> were simulated in different boxes using periodic  
5 boundary conditions. The force field parameters of Na<sup>+</sup>, TEP, and FSI<sup>-</sup> were referred to  
6 the previous publications.<sup>4</sup> First, the simulation box was initially set as a cube with a  
7 length of 10 nm. Then, the systems were preliminarily equilibrated by 0.1 ns energy  
8 minimization, as well as 1 ns canonical ensemble (NVT) and 2 ns isothermal-isobaric  
9 ensemble (NPT) ensemble simulations. Finally, after further 10 ns MD simulations, the  
10 simulation boxes shrank to a suitable size and the systems reached a stable state. During  
11 all simulations, the constant temperature (298 K) and the constant pressure (1.0 bar)  
12 coupling were maintained by Nose-Hoover thermostat<sup>5</sup> and Parrinello-Rahman  
13 pressure,<sup>6</sup> respectively. Linear constraint solver algorithm was used to constrain bond  
14 lengths in our simulations.<sup>7</sup> The cut-off of non-bonded van der Waals interaction and  
15 long-range electrostatic interaction were both set at 1.2 nm for all systems. All RDF  
16 curves were calculated by GROMACS5.0, and the RDF curves were visualized with  
17 visual molecular dynamics (VMD)<sup>8</sup> in this study. The coordination number mentioned  
18 in this manuscript refers to the coordination number of Na<sup>+</sup> in the electrolyte, which is  
19 the total number of neighboring atoms of the centered Na<sup>+</sup> ion in the electrolyte. The  
20 coordination ratios for different species in different coordination shells are calculated  
21 as follows:

22 In HCE and two DHCEs, FSI<sup>-</sup> anion exhibits multi-coordination sites from oxygen,  
23 nitrogen and sulfur atoms of FSI<sup>-</sup> anion. Therefore, the FSI<sup>-</sup> anions could contribute a  
24 large percentage of coordination ratio around Na<sup>+</sup>.

25 The coordinate numbers (N) of Na<sup>+</sup> in different electrolytes are obtained from the  
26 formula (1):

$$27 \quad N=4\pi\rho \int_0^r r^2g(r)dr, \quad \rho=\frac{n}{V} \quad (1)$$

28 in which r is the radius, g(r) is the radial distribution function, n is the specific numbers  
29 of the components in the system, V is the system volume.

1 In addition, the ratios of different components in the coordination shell  $x_i$  are calculated  
2 according to the formula (2):

3 
$$x_i = \frac{N_i}{\sum N_i} \quad (2)$$

4 The first to the third coordination shells are considered for  $r=0.1-0.3$  nm,  $r=0.3-0.5$ ,  
5 and  $r=0.5-1.0$  nm, respectively.

6

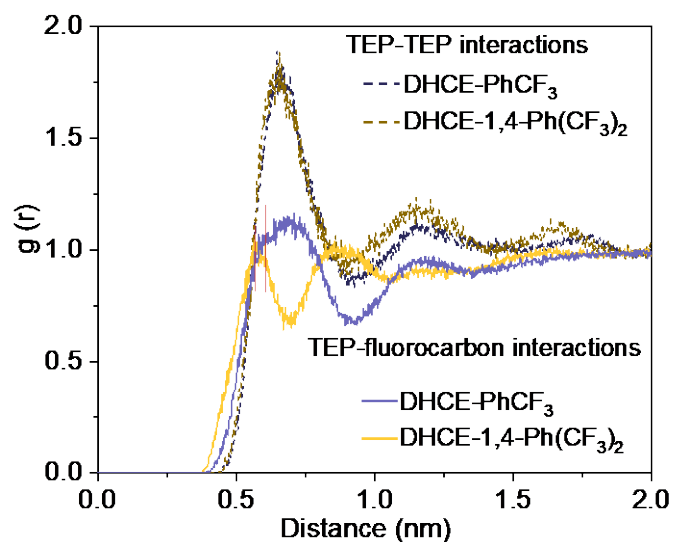

1  
2  
3  
4  
5  
6

**Figure S1.** RDF curves for TEP-TEP interactions and TEP-fluorocarbon interactions in different DHCEs extracted from MD simulations (All the RDF curves in this figure take the centroid of TEP molecule as the reference center).

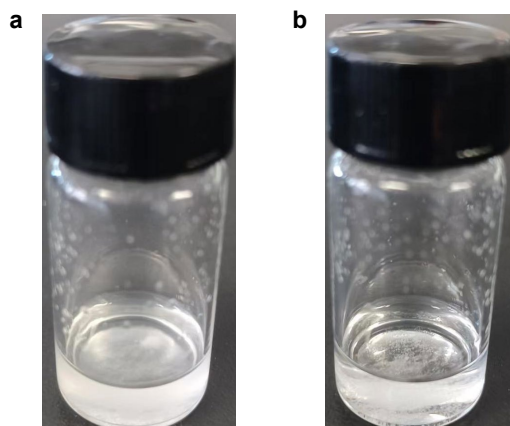

7  
8  
9  
10

**Figure S2.** Images of 0.05 M NaFSI in (a) PhCF<sub>3</sub> and (b) 1,4-Ph(CF<sub>3</sub>)<sub>2</sub>.

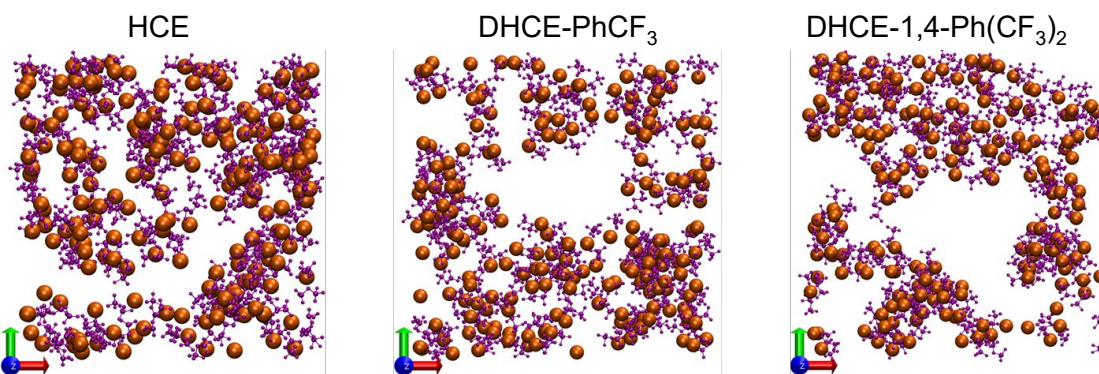

1  
2  
3  
4  
5  
6

**Figure S3.** Long-range bonding structure of  $\text{Na}^+\text{-FSI}^-$  in different electrolytes. Almost all FSI<sup>-</sup> participate in the solvation with  $\text{Na}^+$ . FSI<sup>-</sup> and  $\text{Na}^+$  are shown in purple and orange, respectively.

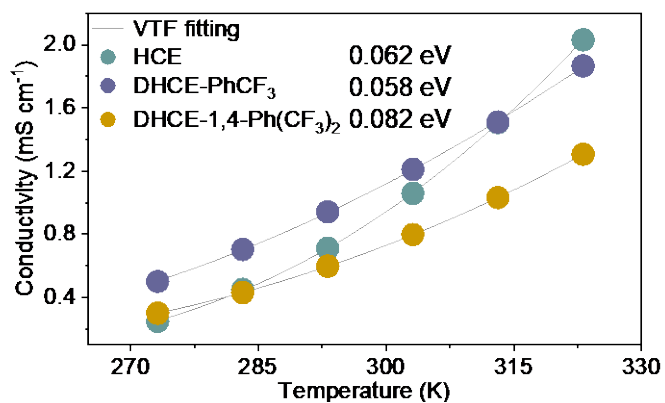

7  
8  
9

**Figure S4.** Fitting of activation energies for different electrolytes using Empirical Vogel-Tamman-Fulcher (VTF) equation.

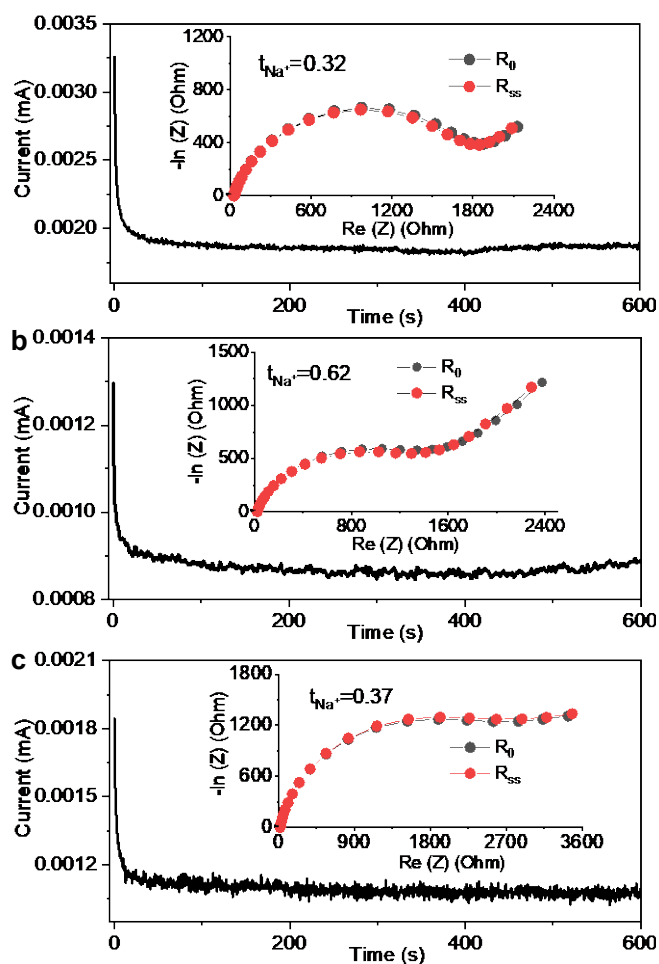

1  
2  
3  
4  
5  
6

**Figure S5.** Characterization of  $\text{Na}^+$  transference number in (a) HCE, (b) DHCE- $\text{PhCF}_3$  and (c) DHCE-1,4- $\text{Ph}(\text{CF}_3)_2$ . Current variations with the polarization of  $\text{Na}||\text{Na}$  symmetric cells with an applied potential of 10 mV and EIS tests before and after polarization in different electrolytes.

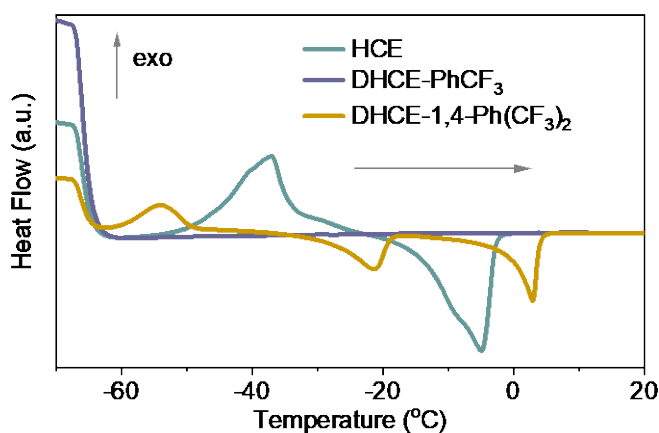

7  
8  
9

**Figure S6.** DSC thermograms at heating scan of HCE, DHCE- $\text{PhCF}_3$  and DHCE-1,4- $\text{Ph}(\text{CF}_3)_2$  in the temperature range of  $-70$  to  $20$  °C.



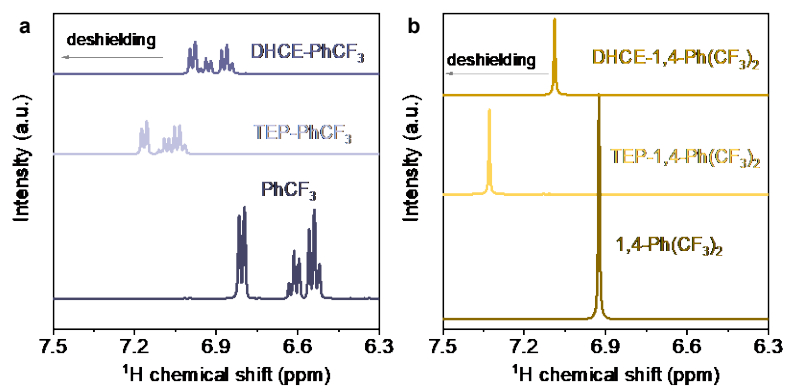

1

2 **Figure S7.**  $^1\text{H}$ -NMR chemical shifts of benzene ring in (a) pure  $\text{PhCF}_3$ , TEP- $\text{PhCF}_3$   
 3 mixed solvent and DHCE- $\text{PhCF}_3$  and (b) 1,4- $\text{Ph}(\text{CF}_3)_2$ , TEP-1,4- $\text{Ph}(\text{CF}_3)_2$  mixed  
 4 solvent and DHCE-1,4- $\text{Ph}(\text{CF}_3)_2$ .

5

6

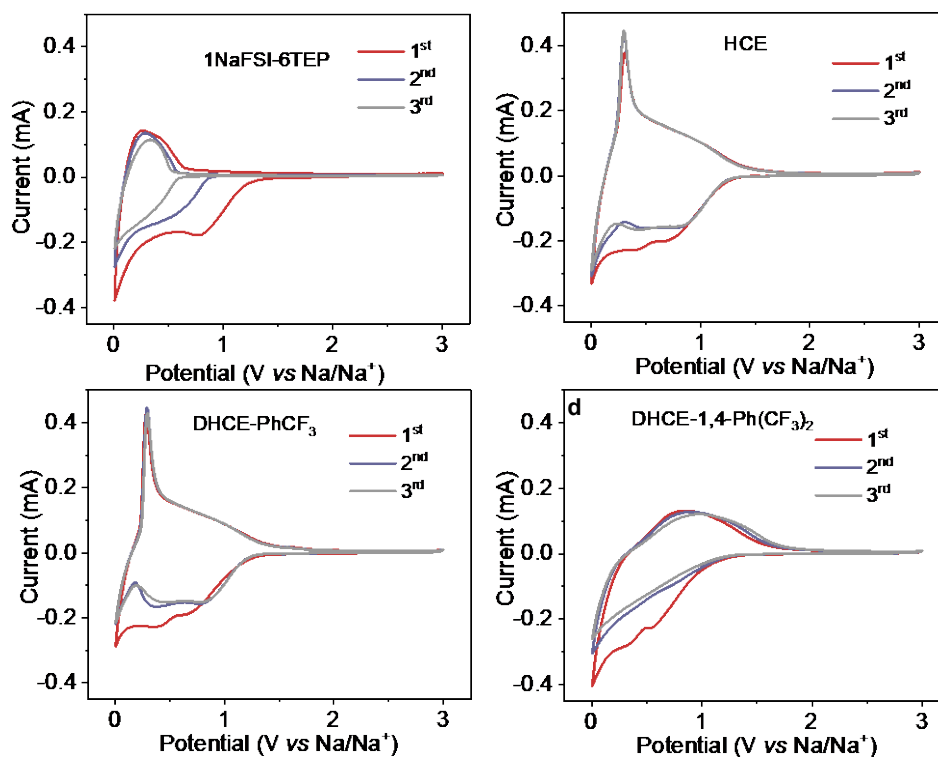

7

8 **Figure S8.** The CV curves of HC anodes at a scan rate of  $0.2 \text{ mV s}^{-1}$  in (a) dilute  
 9 1NaFSI-6TEP, (b) HCE, (c) DHCE- $\text{PhCF}_3$ , and (d) DHCE-1,4- $\text{Ph}(\text{CF}_3)_2$ .

10

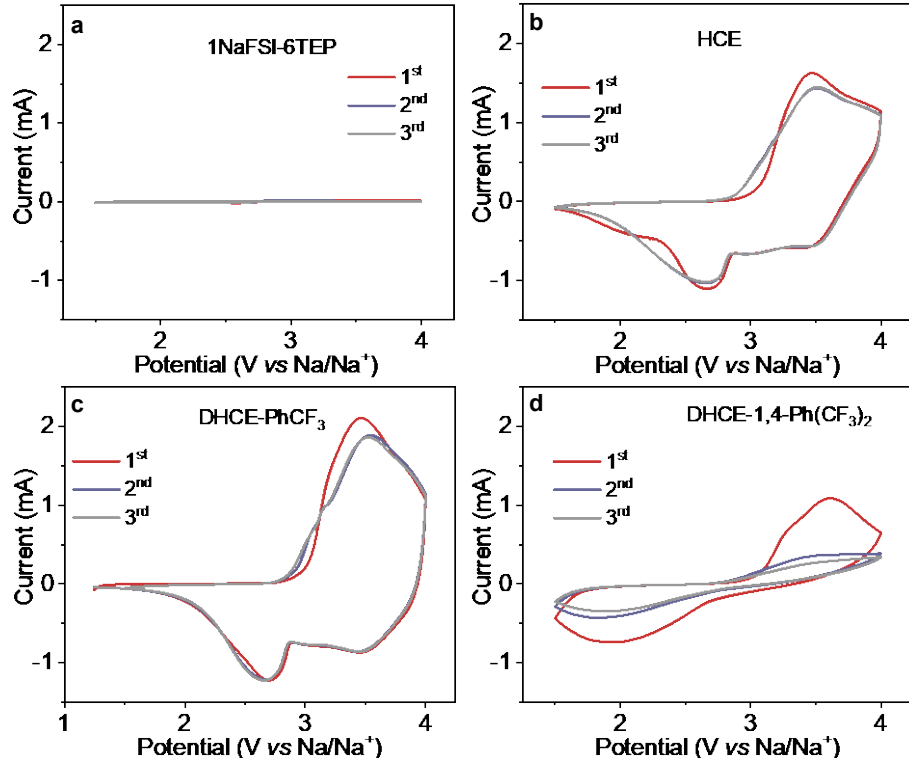

1  
2  
3  
4  
5

**Figure S9.** The initial CV curves of CNFM cathodes at a scan rate of  $0.2 \text{ mVs}^{-1}$  in (a) dilute 1NaFSI-6TEP, (b) HCE, (c) DHCE-PhCF<sub>3</sub>, and (d) DHCE-1,4-Ph(CF<sub>3</sub>)<sub>2</sub>.

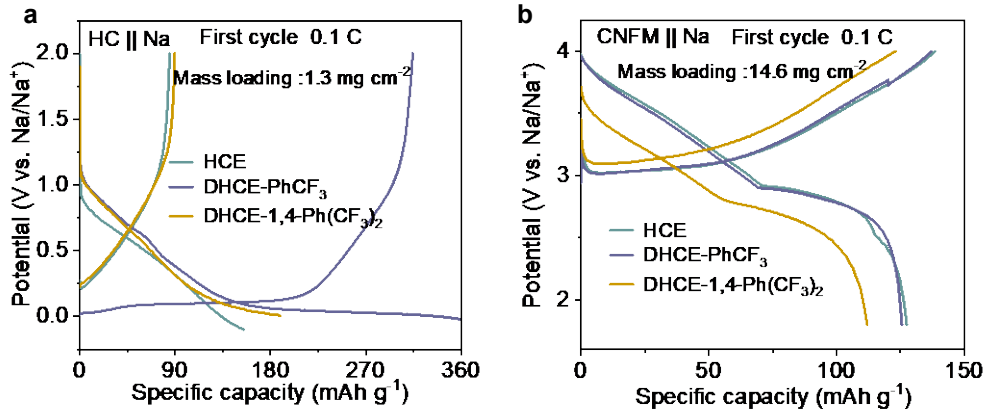

6  
7  
8

**Figure S10.** Typical charge-discharge curves of half cells at  $0.1 \text{ C}$  in different electrolytes of the (a) HC||Na and (b) CNFM||Na.

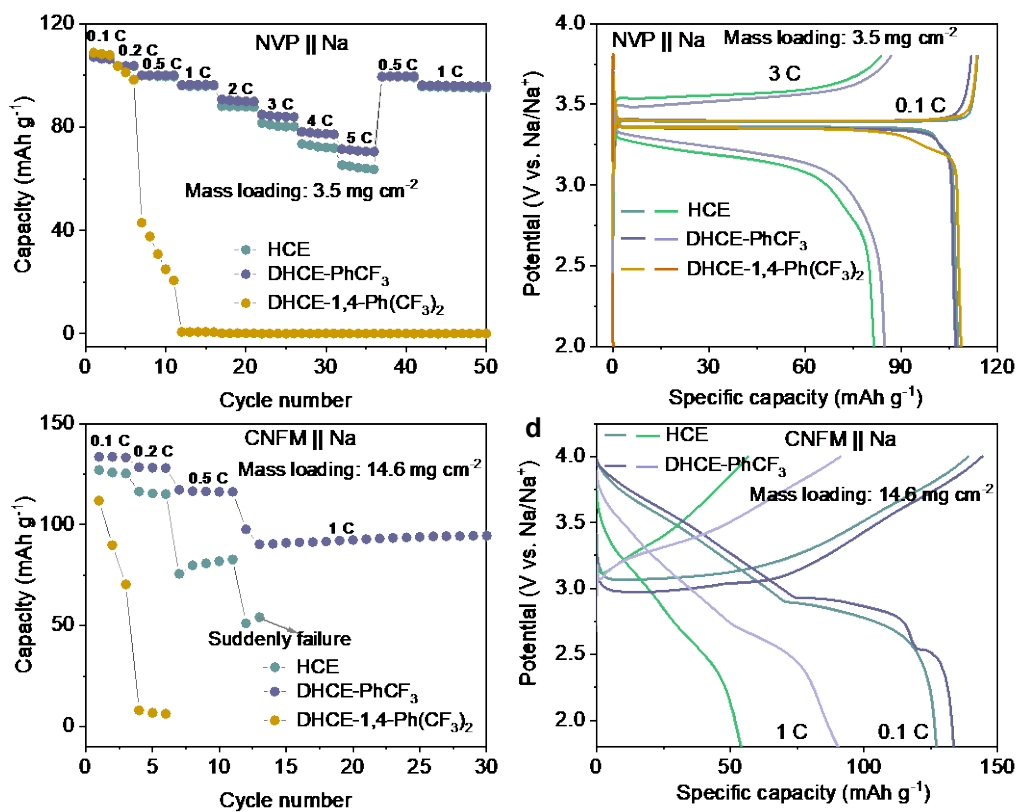

1  
2  
3  
4  
5

**Figure S11.** The rate performance of NVP||Na half cells (a,b) and CNFM||Na half cells (c,d) in different electrolytes.

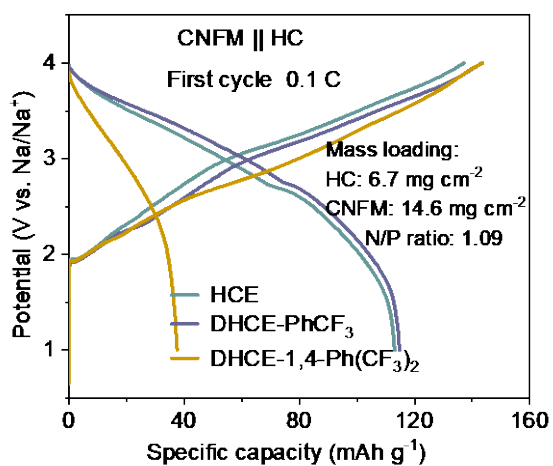

6  
7  
8

**Figure S12.** Typical charge-discharge curves CNFM||HC full cells at 0.1 C in different electrolytes.

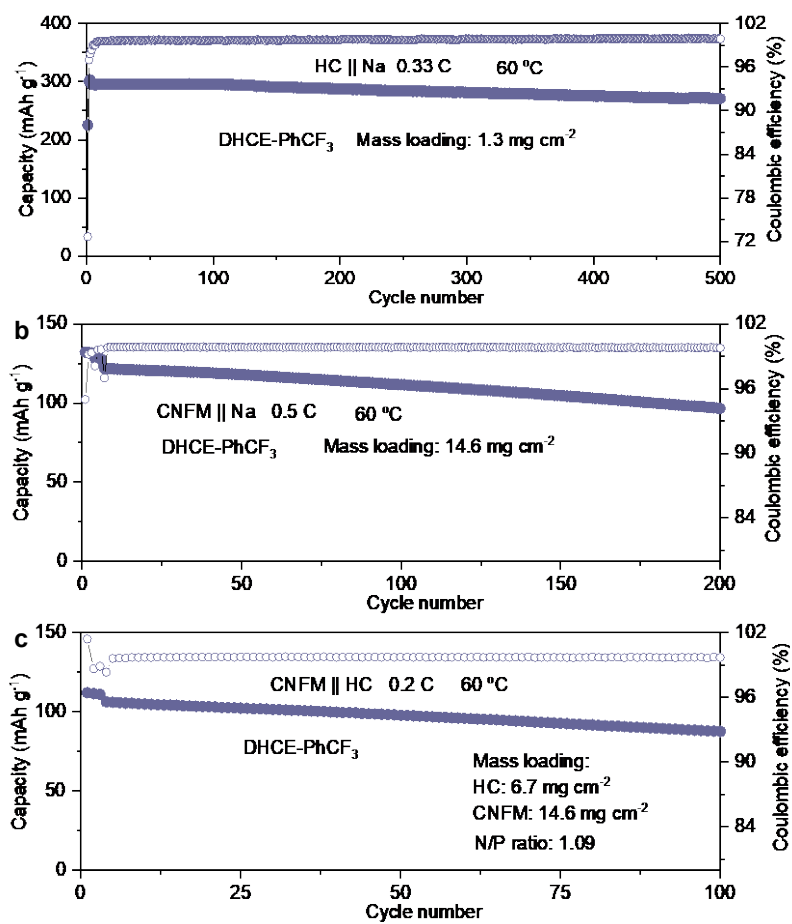

1  
2  
3  
4  
5

**Figure S13.** High-temperature cycling performance of (a) HC || Na half cell (b) CNFM || Na half cell and (c) CNFM || HC full cell in DHCE-PhCF<sub>3</sub> at 60 °C.

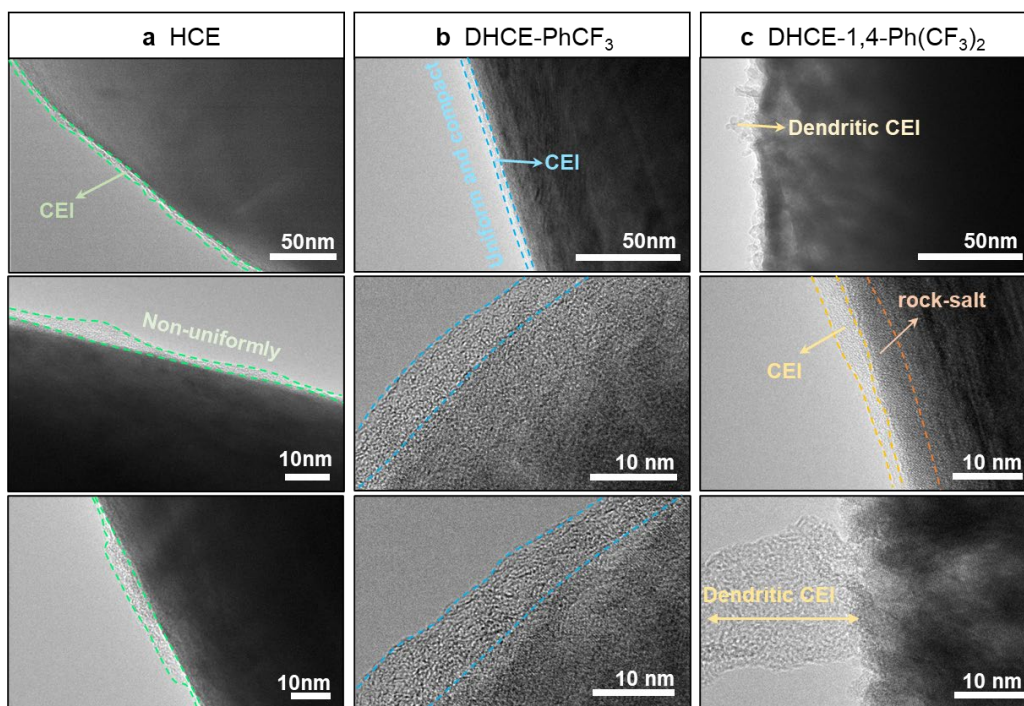

1  
2  
3  
4  
5

**Figure S14.** HRTEM images of the CNFM cathodes cycled in (a) HCE, (b) DHCE-PhCF<sub>3</sub> and (c) DHCE-1,4-Ph(CF<sub>3</sub>)<sub>2</sub>.

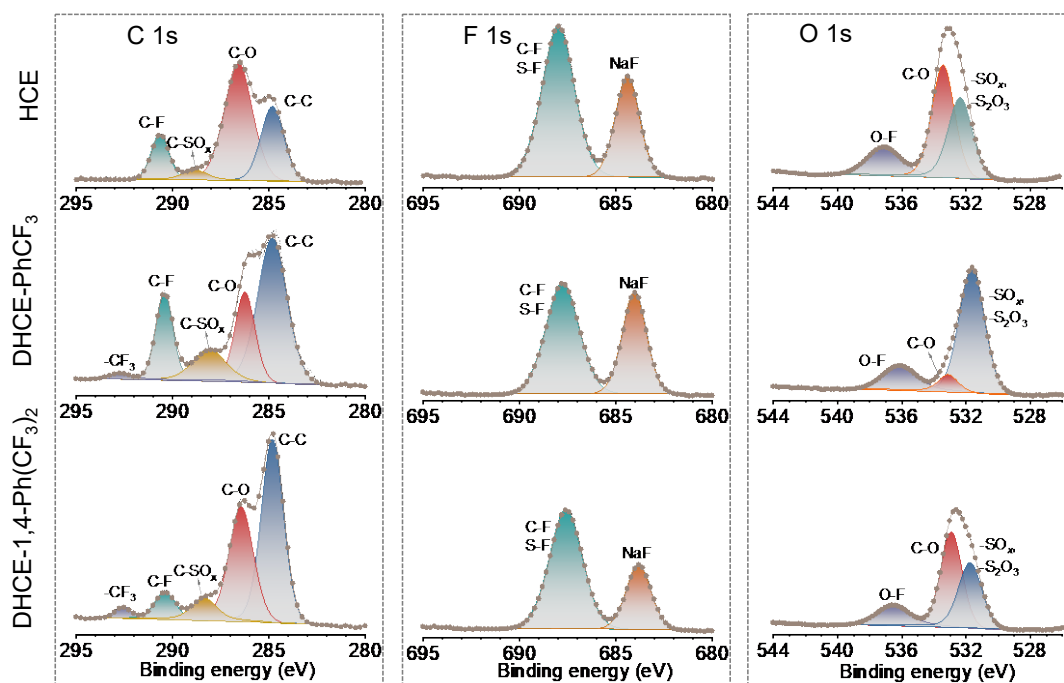

6  
7  
8  
9

**Figure S15.** XPS spectra of selected elements of the SEIs on HC anodes after first cycle in the studied electrolytes: (a) C 1s, (b) F 1s, (c) O 1s.

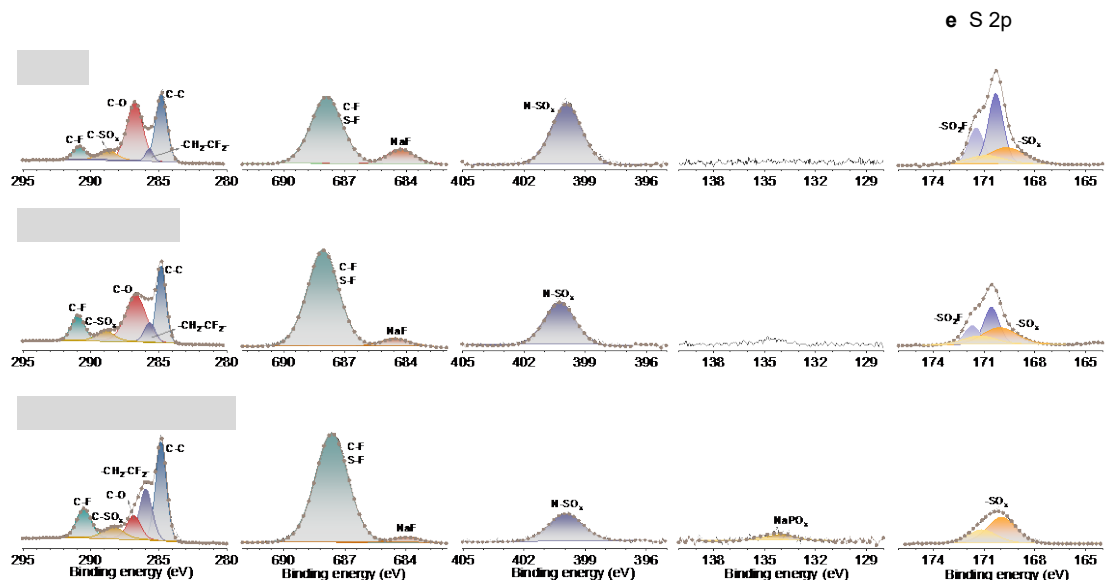

1  
2  
3  
4

**Figure S16.** XPS spectra of selected elements of the CEIs on CNFM cathodes after first cycle in the studied electrolytes: (a) C 1s, (b) F 1s, (c) N 1s, (d) P 2p, (e) S 2p.

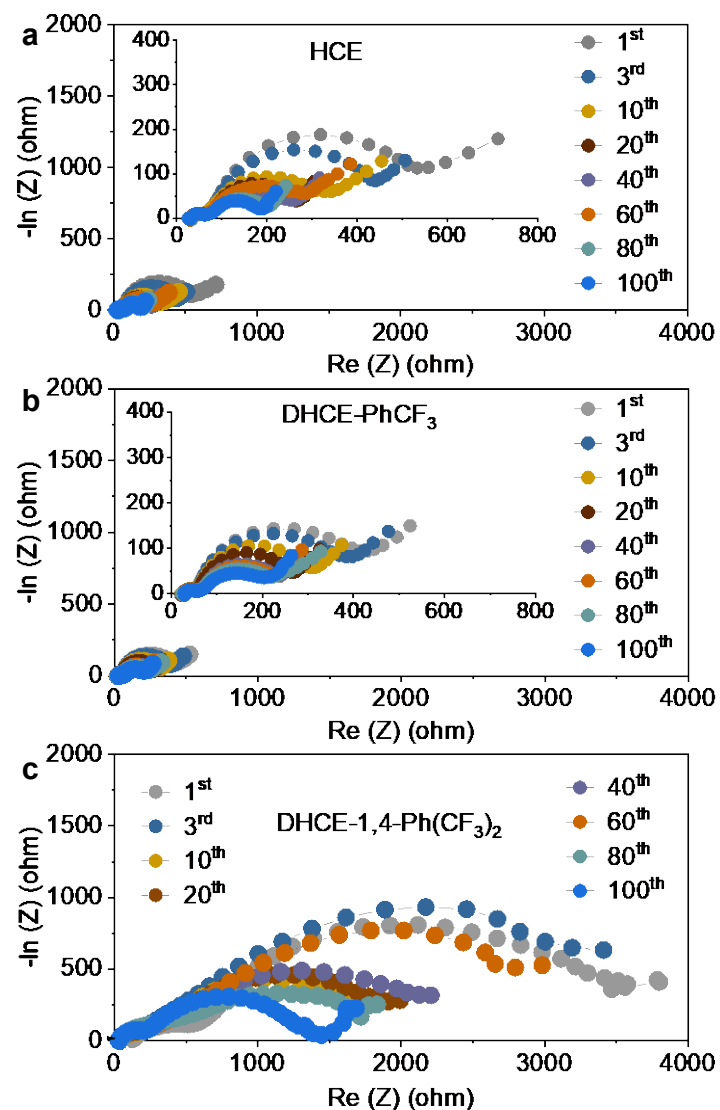

1  
 2 **Figure S17.** Operando-EIS of the CNFM||HC full cells during cycling in (a) HCE, (b)  
 3 DHCE-PhCF<sub>3</sub>, and (c) DHCE-1,4-Ph(CF<sub>3</sub>)<sub>2</sub>.

4

5

6 Table S1. The coordination numbers of different electrolytes at different solvation  
 7 sheaths extracted from MD simulations.

| Electrolyte                                | Coordination number        |                            |                            |
|--------------------------------------------|----------------------------|----------------------------|----------------------------|
|                                            | 1 <sup>st</sup> (0-0.3 nm) | 2 <sup>nd</sup> (0-0.3 nm) | 3 <sup>rd</sup> (0-0.3 nm) |
| HCE                                        | 6.03                       | 16.43                      | 82.86                      |
| DHCE-PhCF <sub>3</sub>                     | 5.86                       | 15.78                      | 79.06                      |
| DHCE-1,4-Ph(CF <sub>3</sub> ) <sub>2</sub> | 5.93                       | 16.37                      | 89.60                      |

## 1 Reference

- 2 1. P. G. Bruce and C. A. Vincent, *J. electroanal. Chem.*, 1987, **225**, 1-17.
- 3 2. M. J. Abraham, T. Murtola, R. Schulz, S. Páll, J. C. Smith, B. Hess and E. Lindahl,  
4 *SoftwareX*, 2015, **1-2**, 19-25.
- 5 3. A. W. Sousa da Silva and W. F. Vranken, *BMC Res. Notes*, 2012, **5**, 367.
- 6 4. M. Ma, B. Chen, X. Yang, Y. Liu, S. Dai, X. Qi, Y.-S. Hu and H. Pan, Solvent  
7 Reorganization and Additives Synergistically Enable High-Performance Na-Ion  
8 Batteries, *ACS Energy Lett.*, 2022, **8**, 477-485.
- 9 5. H. J. C. Berendsen, J. P. M. Postma, W. F. Vangunsteren, A. Dinola and J. R. Haak,  
10 Molecular dynamics with coupling to an external bath, *J. Chemical Physics*, 1984, **81**,  
11 3684-3690.
- 12 6. R. Martonák, A. Laio and M. Parrinello, Predicting crystal structures: the  
13 Parrinello-Rahman method revisited, *Phys. Rev. Lett.*, 2003, **90**, 075503.
- 14 7. B. Hess, H. Bekker, H. J. C. Berendsen and J. Fraaije, LINCS: A linear constraint  
15 solver for molecular simulations, *J. Comput. Chem.*, 1997, **18**, 1463-1472.
- 16 8. W. Humphrey, A. Dalke and K. Schulten, VMD: Visual molecular dynamics, *J.*  
17 *Mol. Graph. & Model.*, 1996, **14**, 33-38.
